# Supplementary material for: Mu opioid receptor mRNA overexpression predicts poor prognosis among 18 common solid cancers: A pan-cancer analysis
Source: PubMed Central journal article supplement (PMC10098160; doi:10.3389/fonc.2023.1134744), 2023-03-30
Supplement: DataSheet_1.pdf [file DataSheet_1.pdf]

Supplementary Material

1.1 Supplementary Figures

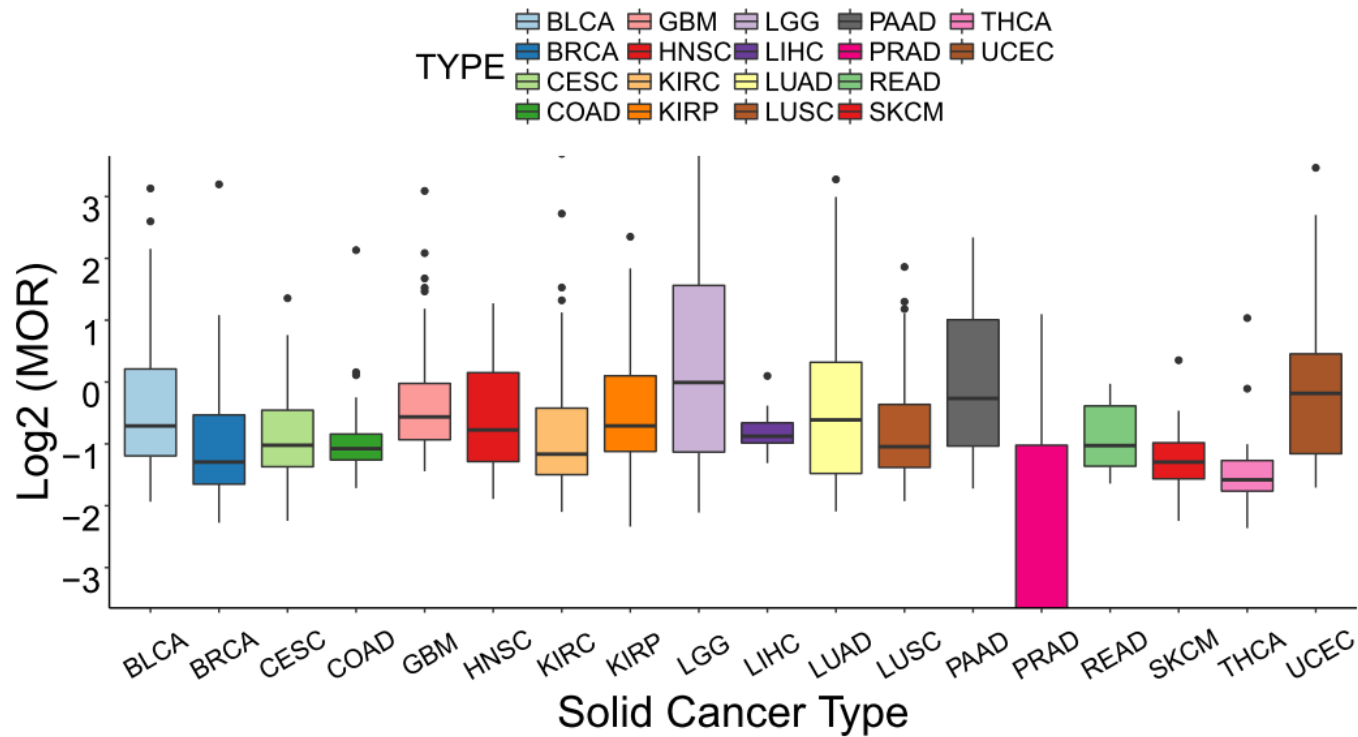

**Supplementary Figure 1.** Distribution of *MOR* mRNA expression across 18 cancer types.

Footnotes: The boxplot displays log 2 conversion values of *MOR* mRNA expression.

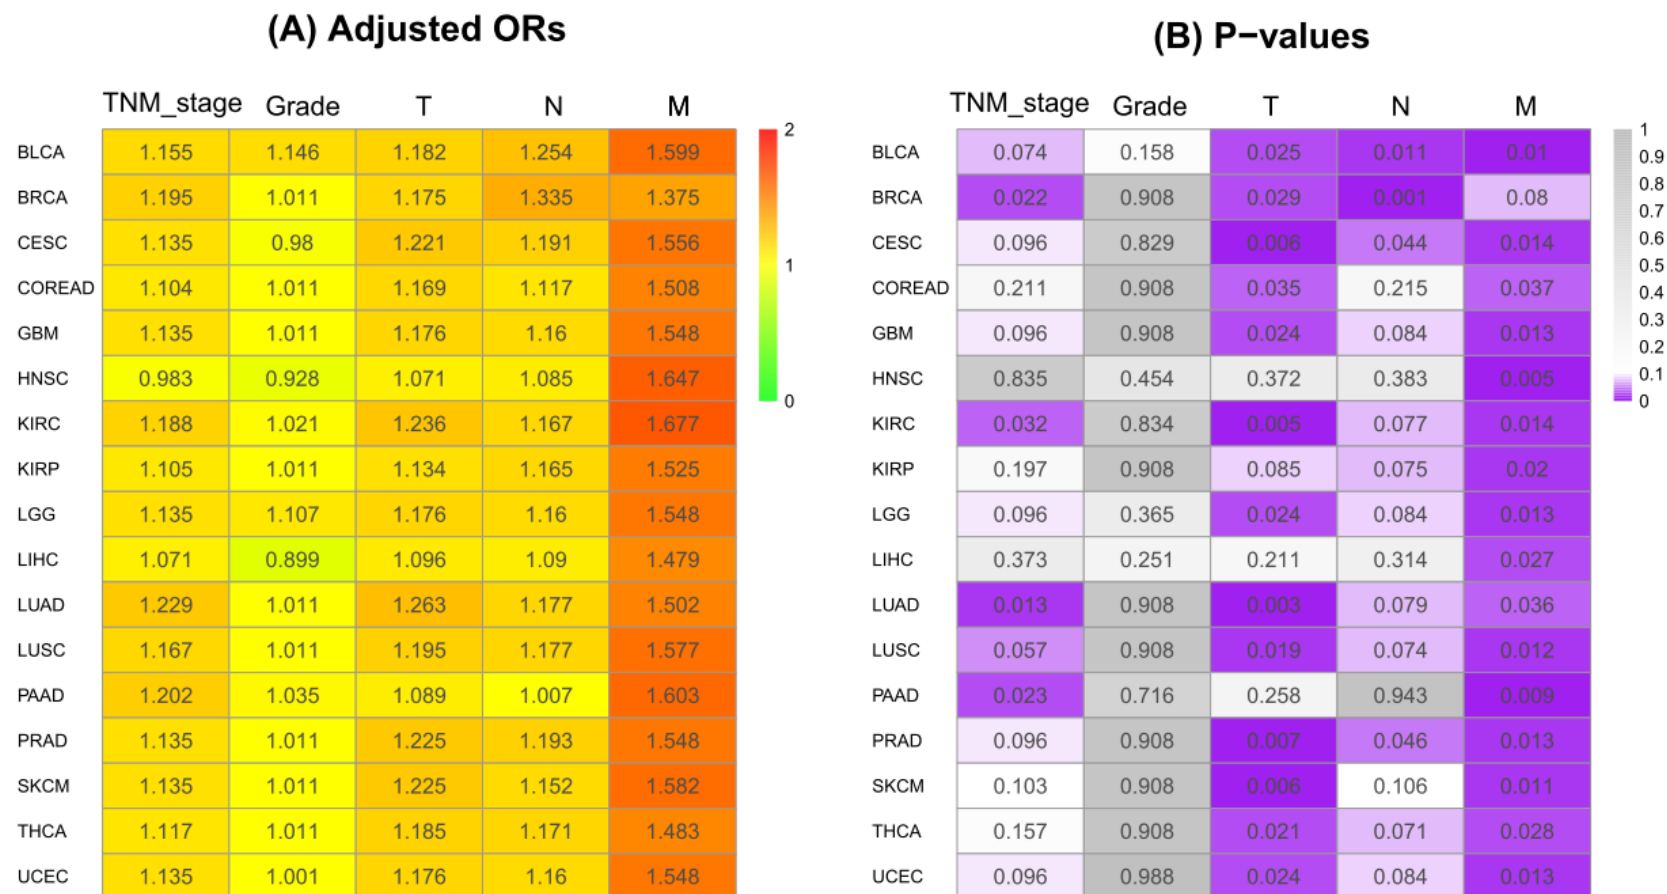

**Supplementary Figure 2.** Association between clinicopathological features and *MOR* mRNA expression for sensitivity analysis.

Footnotes: The heatmaps show (A) adjusted ORs and (B) *P*-values between clinicopathological features (AJCC stage, grade, T stage, N stage and M stage) and *MOR* mRNA expression for sensitivity analysis. Different colours correspond to different values from small to large.

**(A) Adjusted ORs**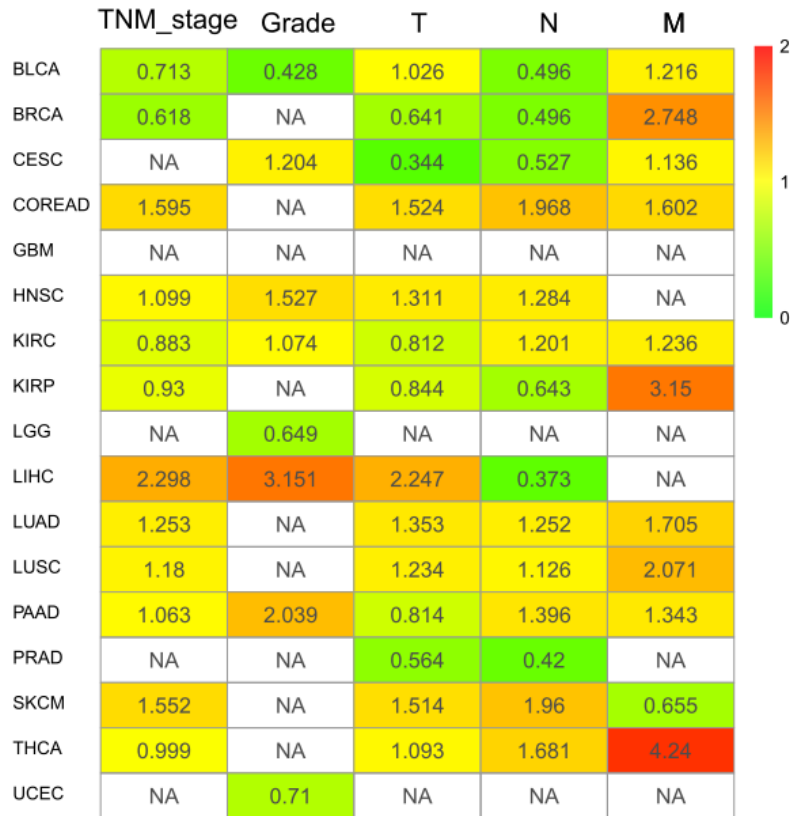**(B) P-values**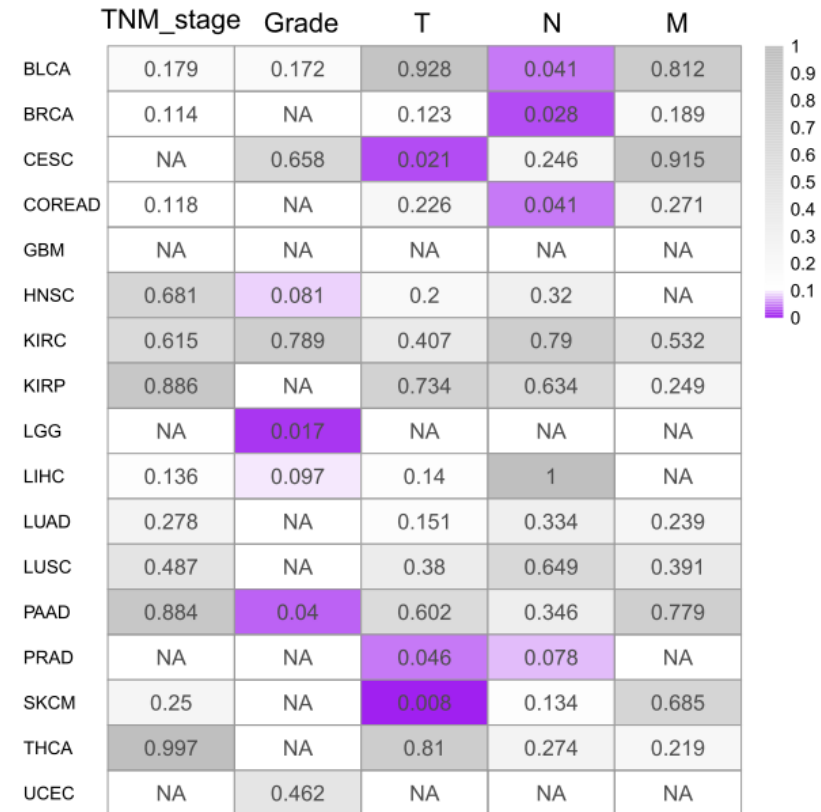**Supplementary Figure 3.** Association between clinicopathological features and *MOR* mRNA expression across different cancer types for subgroup analysis.

Footnotes: The heatmaps show (A) adjusted ORs and (B) *P*-values between clinicopathological features (AJCC stage, grade, T stage, N stage and M stage) and *MOR* mRNA expression in each cancer type. Different colors correspond to different values from small to large.

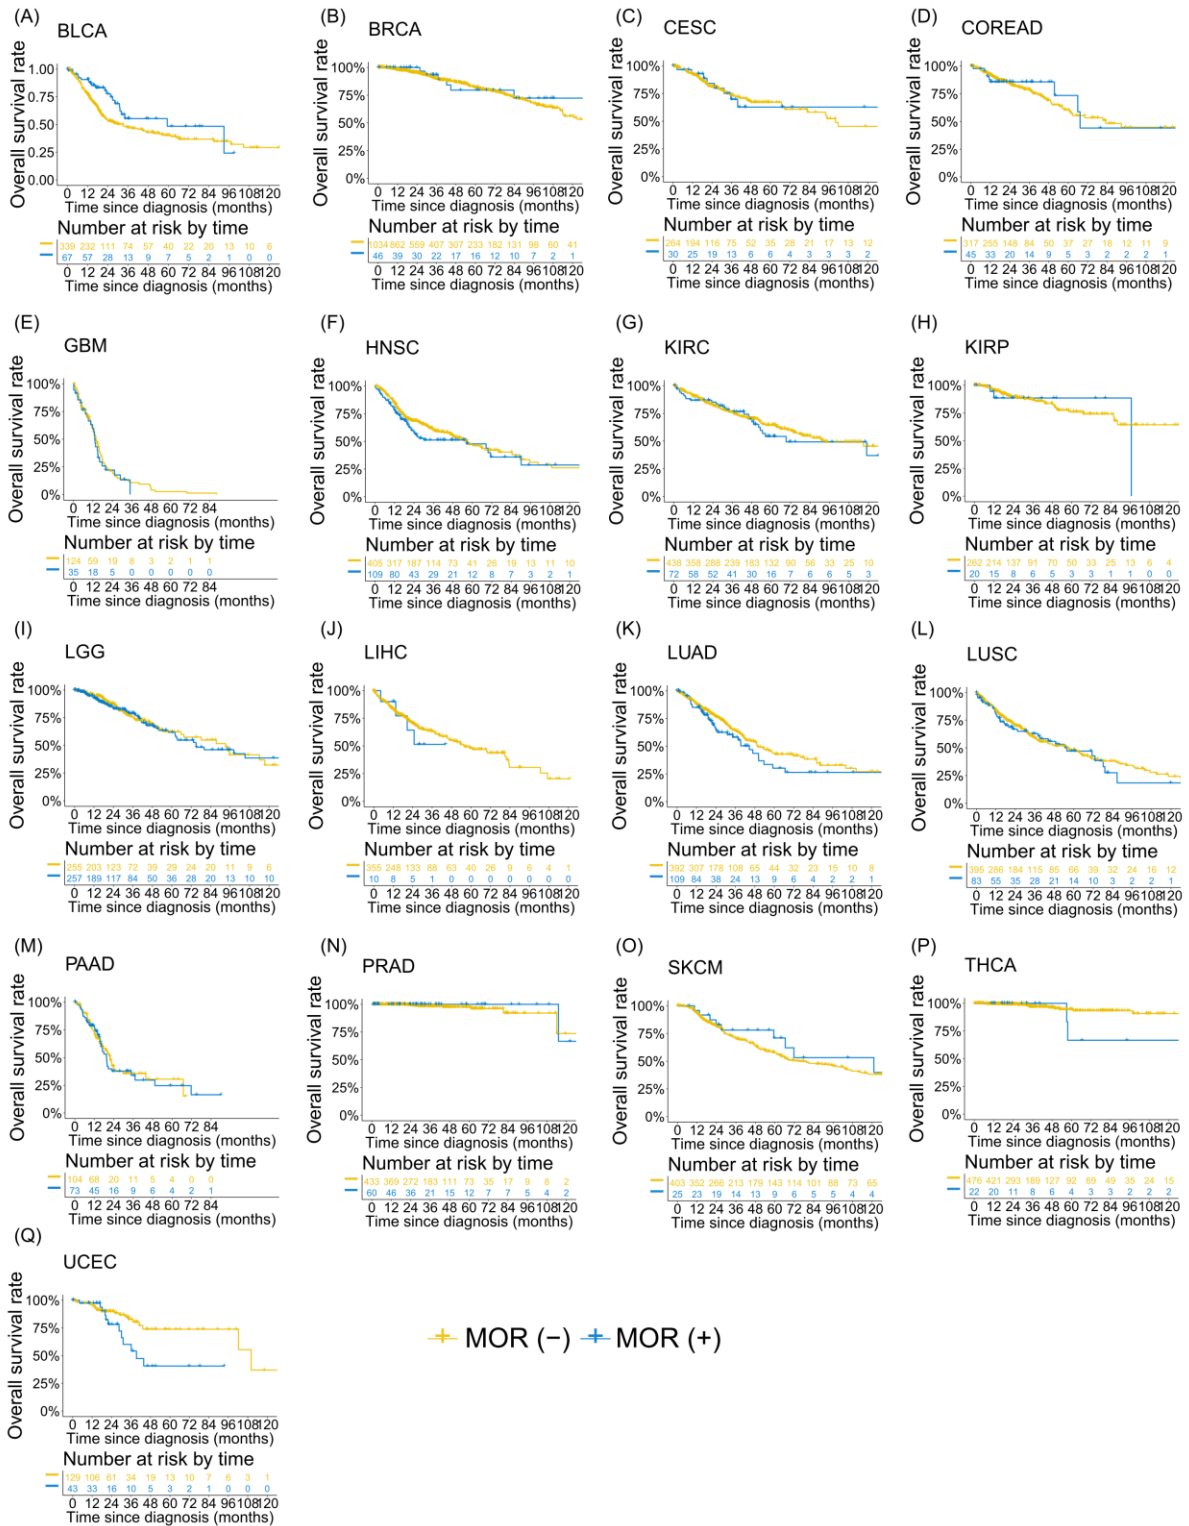

**Supplementary Figure 4.** Kaplan-Meier curves for OS according to *MOR* mRNA expression across different cancer types.

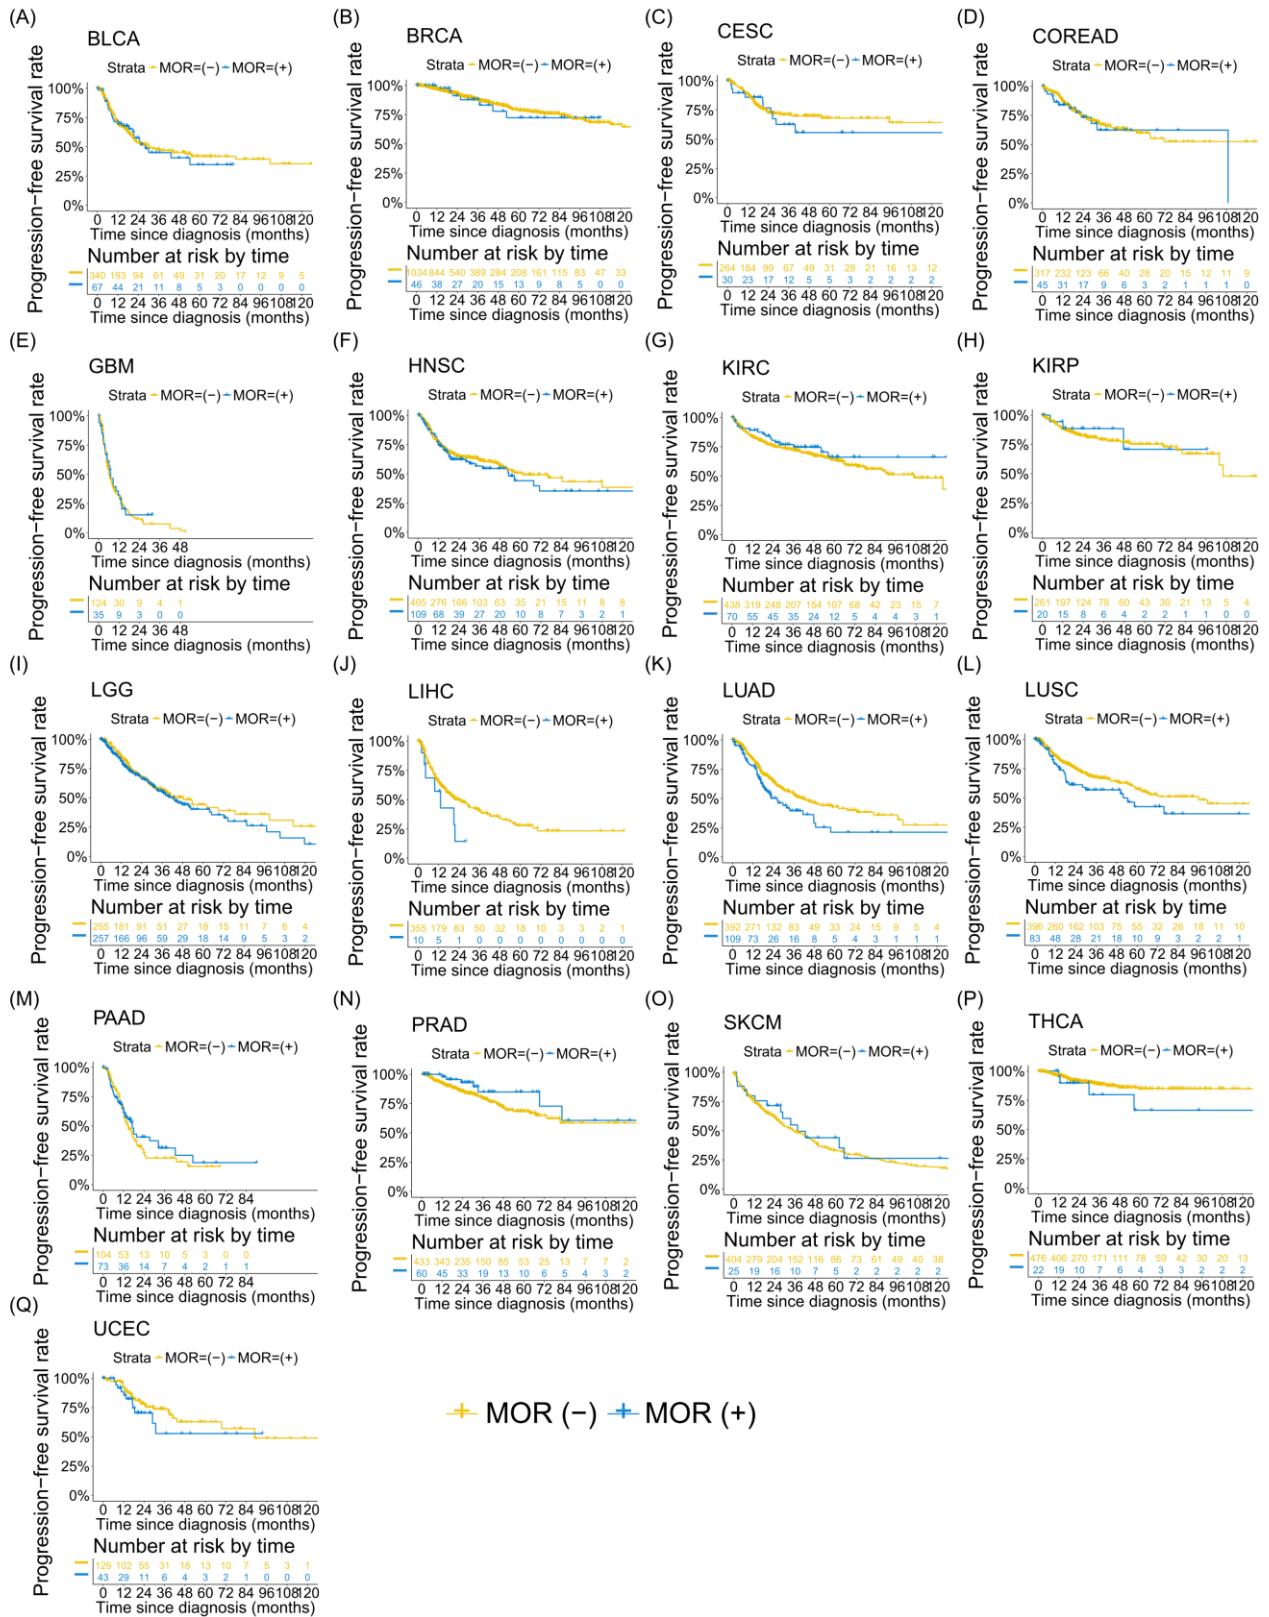

**Supplementary Figure 5.** Kaplan-Meier curves for PFS according to *MOR* mRNA expression across different cancer types.

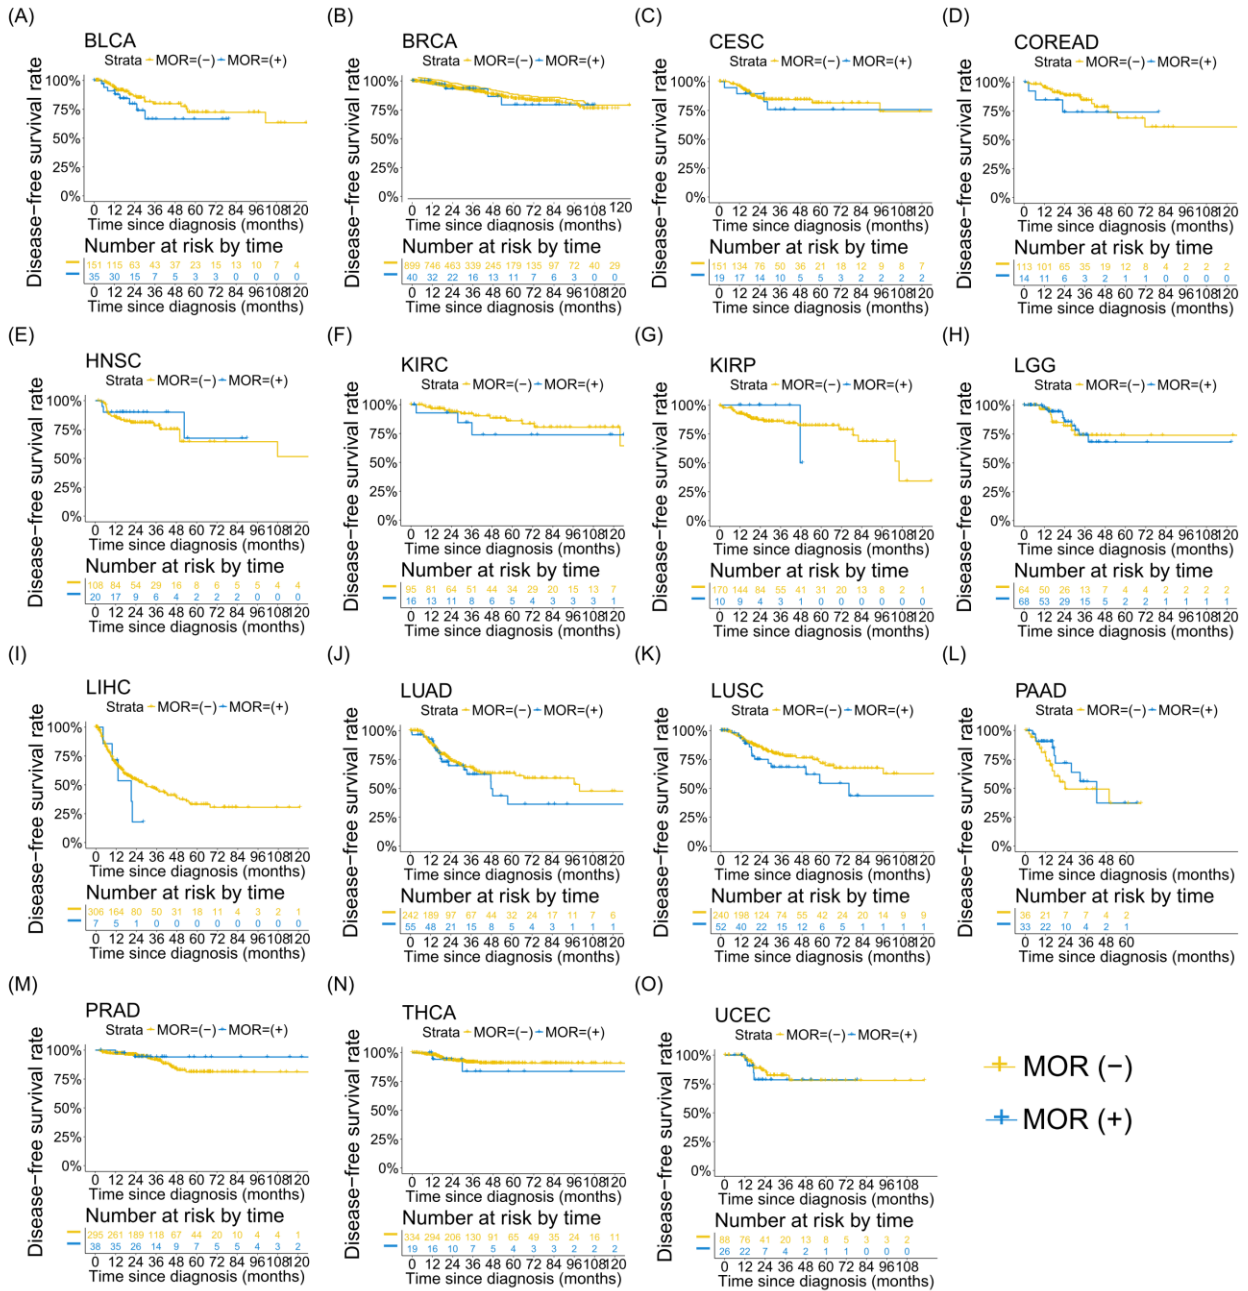

**Supplementary Figure 6.** Kaplan-Meier curves for DFS according to *MOR* mRNA expression across different cancer types.



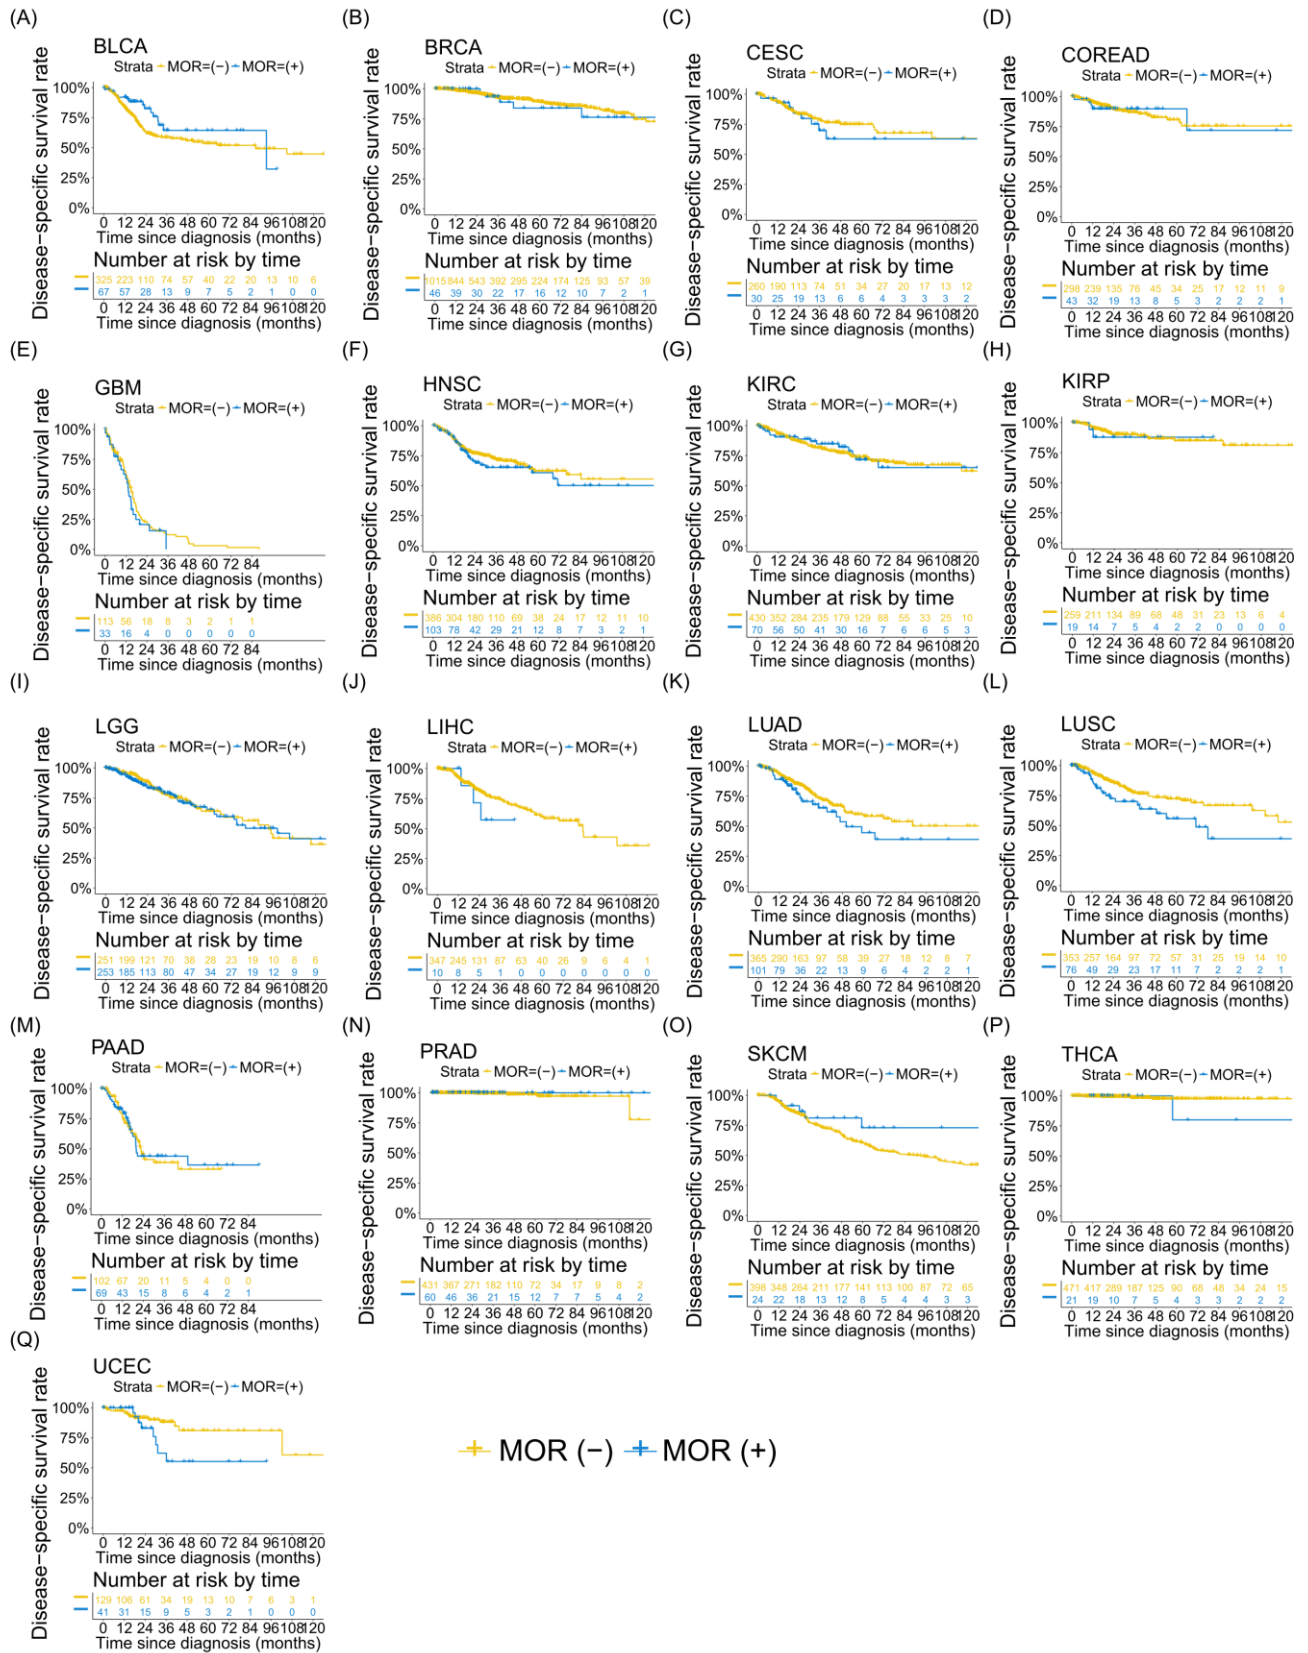

**Supplementary Figure 7.** Kaplan-Meier curves for DSS according to *MOR* mRNA expression across different cancer types.

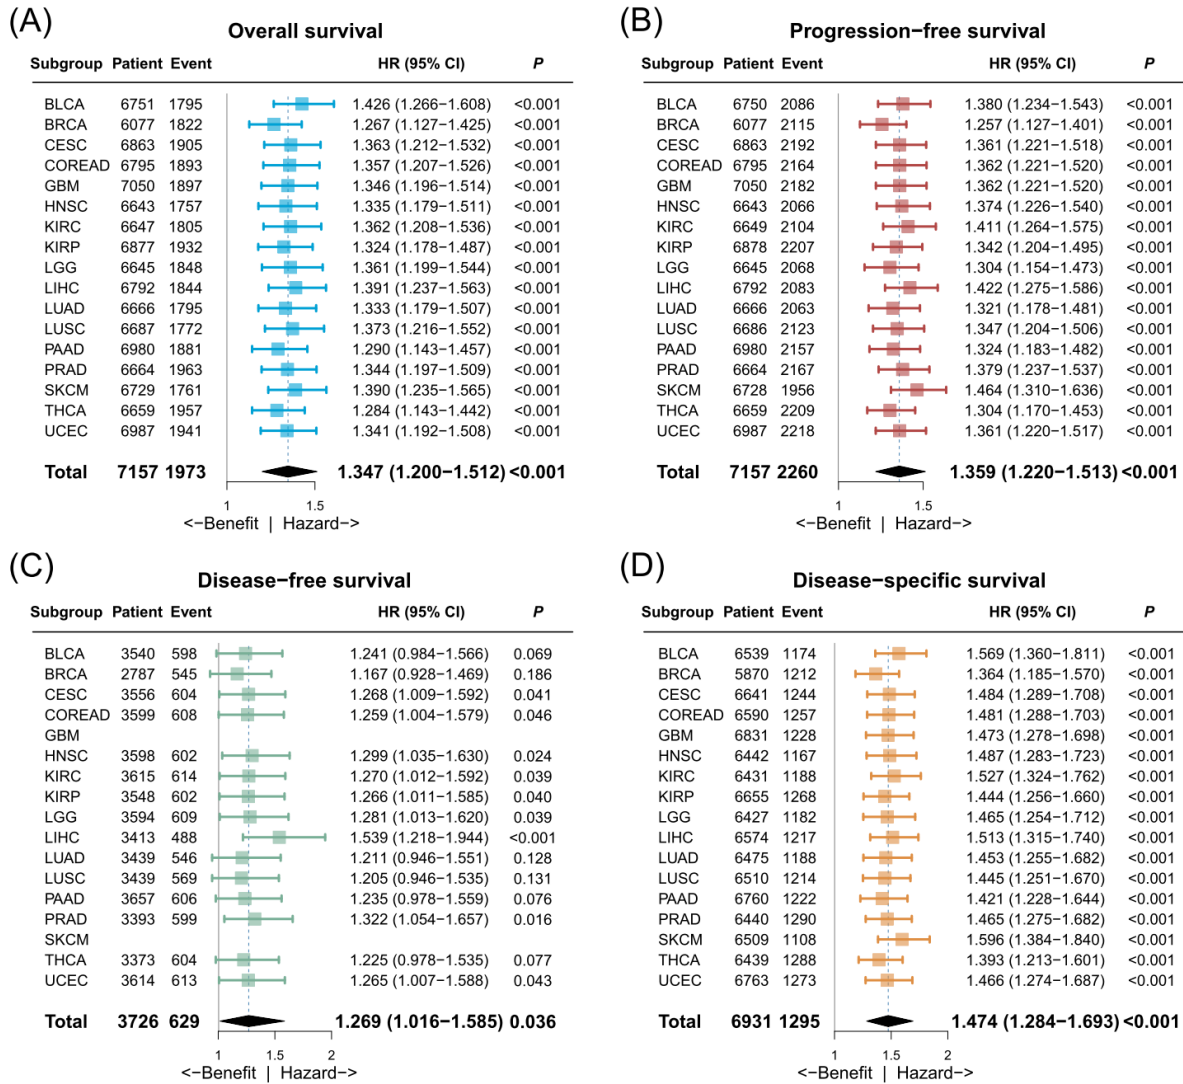

**Supplementary Figure 8.** The impact of *MOR* mRNA expression on prognosis for sensitivity analysis.

Footnotes: Forest map for (A) OS, (B) PFS, (C) DFS and (D) DSS.



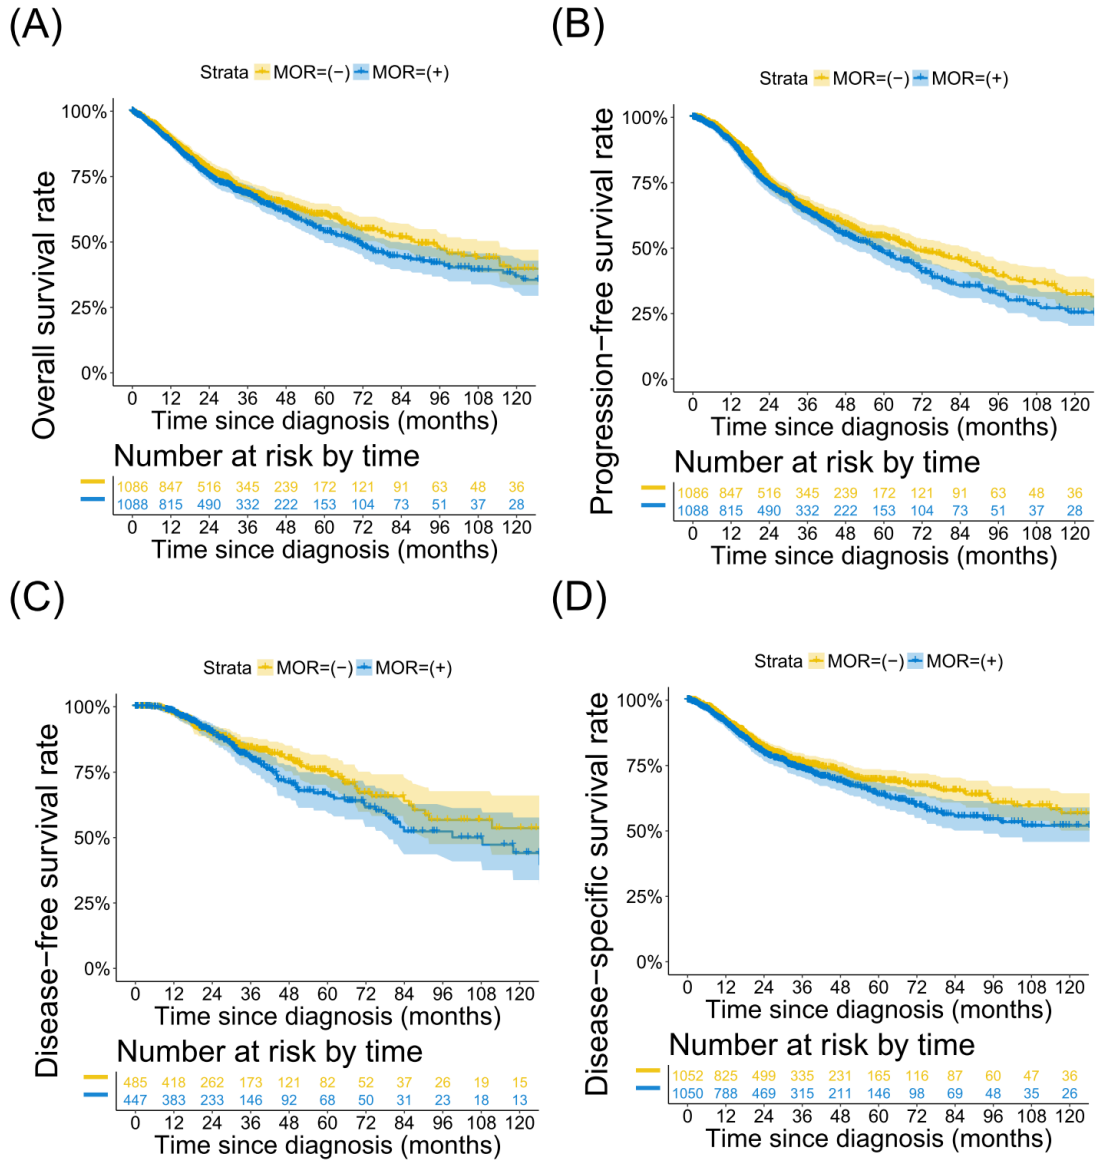

**Supplementary Figure 9.** Kaplan-Meier survival curves according to *MOR* mRNA expression with the balanced data after PSM.

Footnotes: Kaplan-Meier curves for (A) OS, (B) PFS, (C) DFS and (D) DSS.

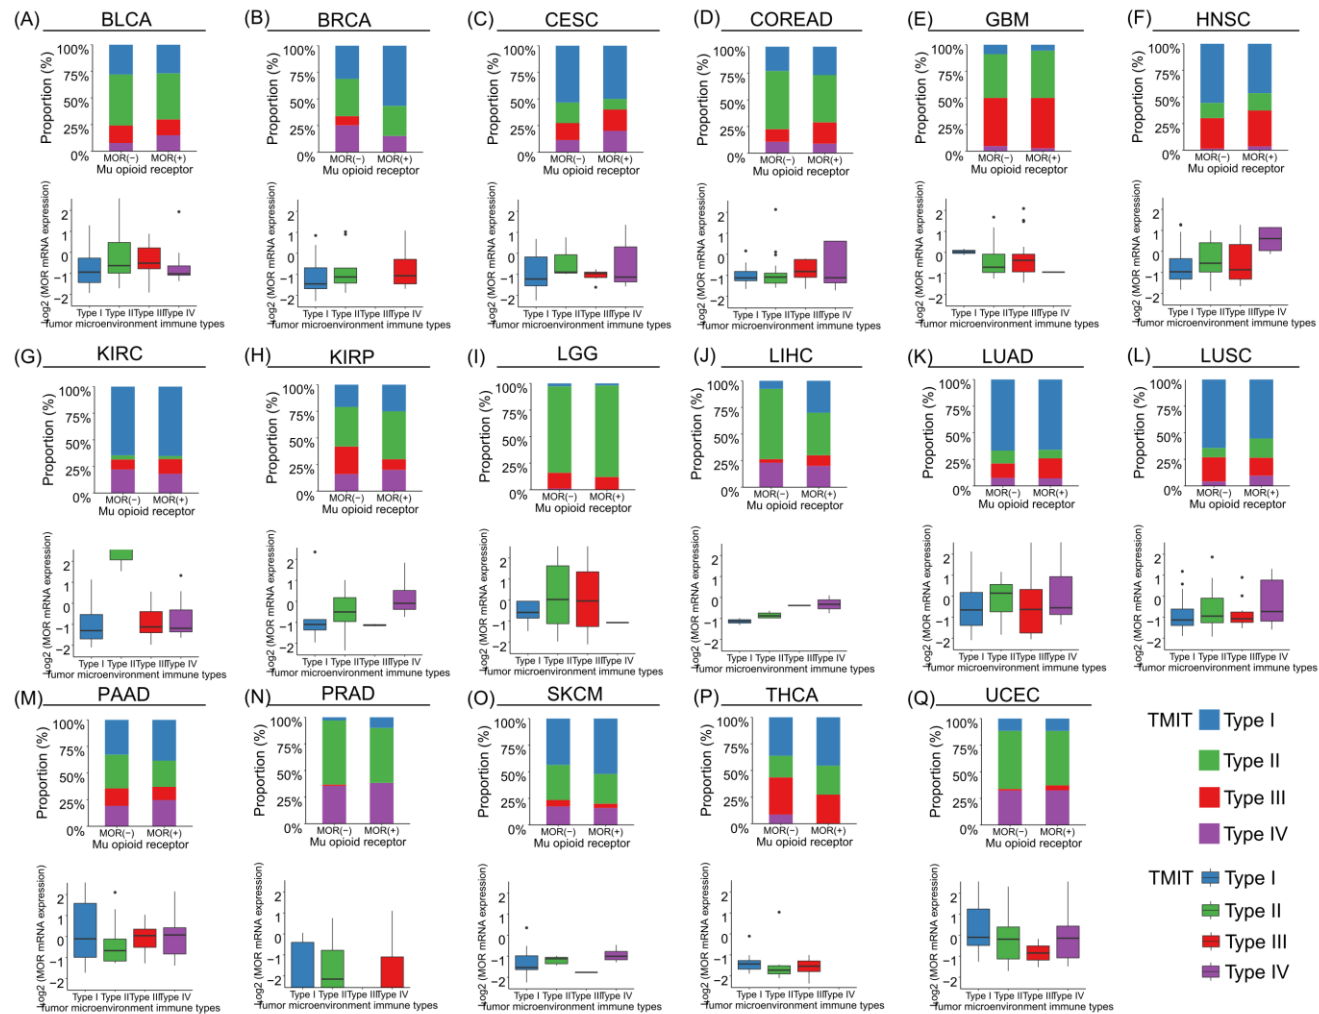

**Supplementary Figure 10.** Distribution of TMITs according to *MOR* mRNA expression, and *MOR* mRNA expression according to TMIT across different cancer types.

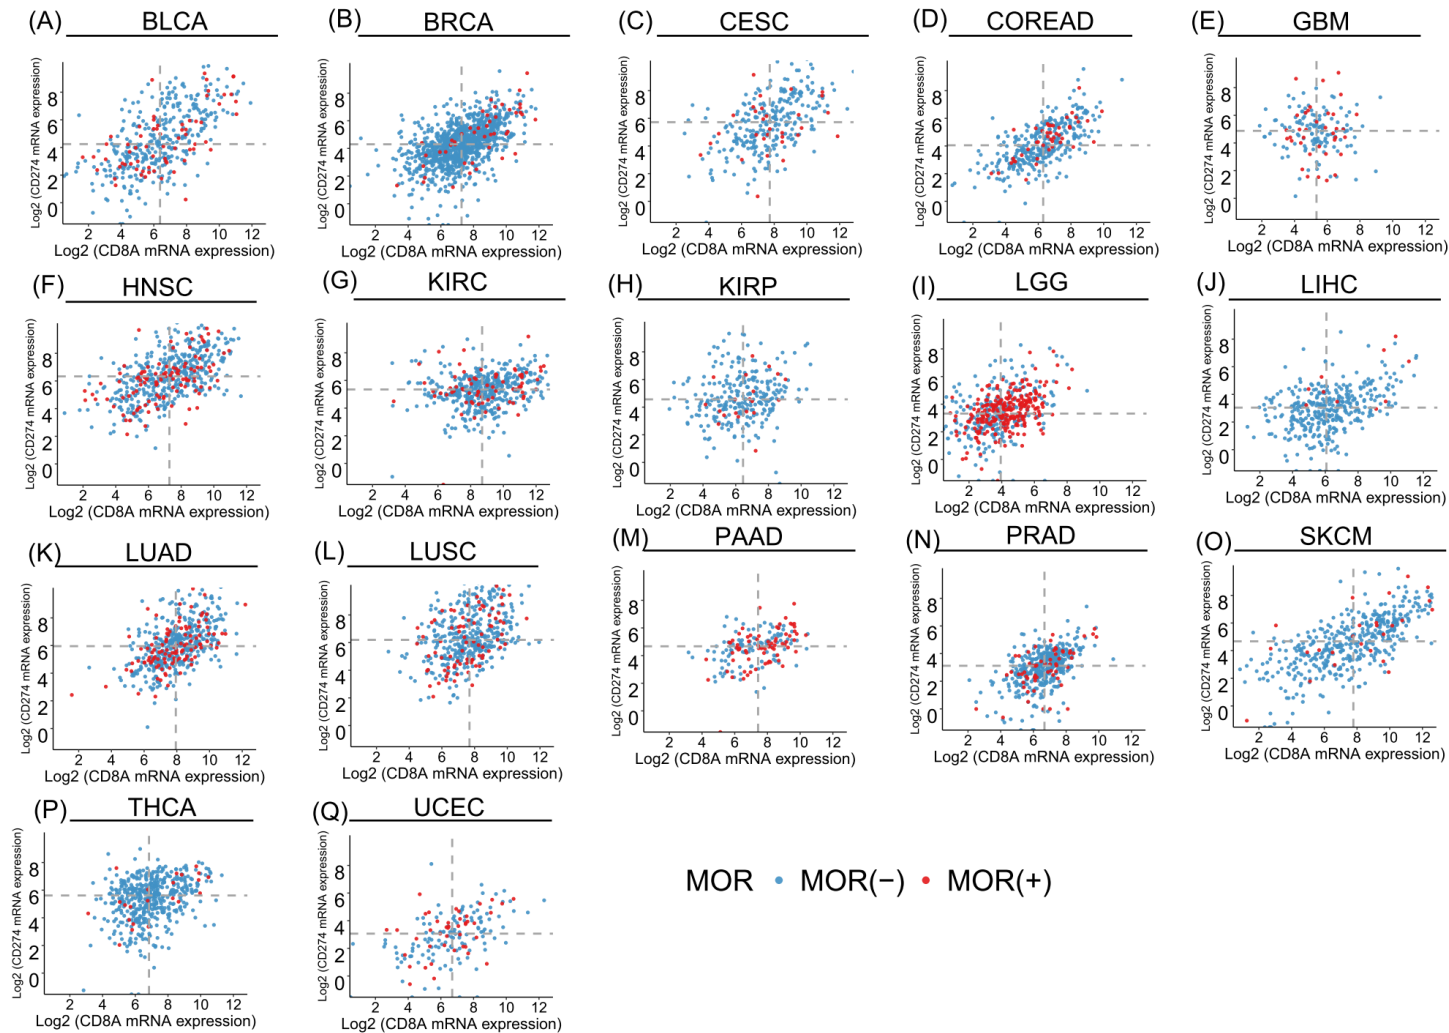

**Supplementary Figure 11.** Correlation between mRNA expression level of PD-L1 and CD8A across different cancer types.

Footnotes: Blue dots indicate patients with negative *MOR* mRNA expression; Red dots indicate patients with positive *MOR* mRNA expression; Grey dotted lines indicate the mean expression.

## 1.2 Supplementary Tables

**Supplementary Table 1.** Baseline characteristics of included patients by cancer type.

| Characteristic |           | BLCA (407) | BRCA(1082)  | CESC(294)   | COAD(276)  | GBM(160)    | HNSC(515)  | KIRC(510)  | KIRP(283)  | LGG(514)    |
|----------------|-----------|------------|-------------|-------------|------------|-------------|------------|------------|------------|-------------|
| <i>MOR</i>     | Positive  | 67 (16.5)  | 46 (4.3)    | 30 (10.2)   | 28 (10.1)  | 36 (22.5)   | 110 (21.4) | 72 (14.1)  | 20 (7.1)   | 258 (50.2)  |
|                | Negative  | 340 (83.5) | 1036 (95.7) | 264 (89.8)  | 248 (89.9) | 124 (77.5)  | 405 (78.6) | 438 (85.9) | 263 (92.9) | 256 (49.8)  |
| Age            |           | 68.1±10.6  | 58.4±13.2   | 48.2±13.9   | 65.0±13.3  | 60.2±14.0   | 60.8±11.8  | 60.5±12.1  | 61.4±12.1  | 42.9±13.4   |
| Age group      | Young     | 106 (26.0) | 598 (55.3)  | 237 (80.6)  | 99 (35.9)  | 55 (34.4)   | 255 (49.5) | 256 (50.2) | 131 (46.3) | 452 (87.9)  |
|                | Old       | 301 (74.0) | 484 (44.7)  | 57 (19.4)   | 175 (63.4) | 52 (32.5)   | 259 (50.3) | 254 (49.8) | 149 (52.7) | 61 (11.9)   |
|                | Unknown   | 0 (0.0)    | 0 (0.0)     | 0 (0.0)     | 2 (0.7)    | 53 (33.1)   | 1 (0.2)    | 0 (0.0)    | 3 (1.1)    | 1 (0.2)     |
| Gender         | Female    | 107 (26.3) | 1070 (98.9) | 294 (100.0) | 122 (44.2) | 44 (27.5)   | 135 (26.2) | 185 (36.3) | 72 (25.4)  | 228 (44.4)  |
|                | Male      | 300 (73.7) | 12 (1.1)    | 0 (0.0)     | 152 (55.1) | 63 (39.4)   | 380 (73.8) | 325 (63.7) | 211 (74.6) | 285 (55.4)  |
|                | Unknown   | 0 (0.0)    | 0 (0.0)     | 0 (0.0)     | 2 (0.7)    | 53 (33.1)   | 0 (0.0)    | 0 (0.0)    | 0 (0.0)    | 1 (0.2)     |
| Race           | Caucasian | 324 (79.6) | 749 (69.2)  | 201 (68.4)  | 188 (68.1) | 96 (60.0)   | 440 (85.4) | 440 (86.3) | 199 (70.3) | 474 (92.2)  |
|                | African   | 23 (5.7)   | 182 (16.8)  | 28 (9.5)    | 55 (19.9)  | 6 (3.8)     | 47 (9.1)   | 55 (10.8)  | 61 (21.6)  | 21 (4.1)    |
|                | Others    | 60 (14.7)  | 151 (14.0)  | 65 (22.1)   | 33 (12.0)  | 58 (36.2)   | 28 (5.4)   | 15 (2.9)   | 23 (8.1)   | 19 (3.7)    |
| AJCC stage     | Stage I   | 2 (0.5)    | 180 (16.6)  | 0 (0.0)     | 45 (16.3)  | 0 (0.0)     | 27 (5.2)   | 249 (48.8) | 169 (59.7) | 0 (0.0)     |
|                | Stage II  | 129 (31.7) | 615 (56.8)  | 0 (0.0)     | 107 (38.8) | 0 (0.0)     | 74 (14.4)  | 54 (10.6)  | 22 (7.8)   | 0 (0.0)     |
|                | Stage III | 140 (34.4) | 249 (23.0)  | 0 (0.0)     | 79 (28.6)  | 0 (0.0)     | 79 (15.3)  | 124 (24.3) | 50 (17.7)  | 0 (0.0)     |
|                | Stage IV  | 134 (32.9) | 19 (1.8)    | 0 (0.0)     | 36 (13.0)  | 0 (0.0)     | 265 (51.5) | 83 (16.3)  | 15 (5.3)   | 0 (0.0)     |
|                | Others    | 2 (0.5)    | 19 (1.8)    | 294 (100.0) | 9 (3.3)    | 160 (100.0) | 70 (13.6)  | 0 (0.0)    | 27 (9.5)   | 514 (100.0) |
| Grade          | Low Grade | 21 (5.2)   | 0 (0.0)     | 147 (50.0)  | 0 (0.0)    | 0 (0.0)     | 363 (70.5) | 227 (44.5) | 0 (0.0)    | 248 (48.2)  |

|        |            |            |              |            |             |             |            |            |             |             |
|--------|------------|------------|--------------|------------|-------------|-------------|------------|------------|-------------|-------------|
|        | High Grade | 383 (94.1) | 0 (0.0)      | 115 (39.1) | 0 (0.0)     | 0 (0.0)     | 130 (25.2) | 275 (53.9) | 0 (0.0)     | 264 (51.4)  |
|        | Others     | 3 (0.7)    | 1082 (100.0) | 32 (10.9)  | 276 (100.0) | 160 (100.0) | 22 (4.3)   | 8 (1.6)    | 283 (100.0) | 2 (0.4)     |
| AJCC-T | T1         | 3 (0.7)    | 276 (25.5)   | 134 (45.6) | 6 (2.2)     | 0 (0.0)     | 48 (9.3)   | 254 (49.8) | 189 (66.8)  | 0 (0.0)     |
|        | T2         | 118 (29.0) | 627 (57.9)   | 71 (24.1)  | 43 (15.6)   | 0 (0.0)     | 134 (26.0) | 66 (12.9)  | 32 (11.3)   | 0 (0.0)     |
|        | T3         | 194 (47.7) | 137 (12.7)   | 20 (6.8)   | 187 (67.8)  | 0 (0.0)     | 97 (18.8)  | 179 (35.1) | 58 (20.5)   | 0 (0.0)     |
|        | T4         | 58 (14.3)  | 36 (3.3)     | 8 (2.7)    | 37 (13.4)   | 0 (0.0)     | 173 (33.6) | 11 (2.2)   | 2 (0.7)     | 0 (0.0)     |
|        | Others     | 34 (8.4)   | 6 (0.6)      | 61 (20.7)  | 3 (1.1)     | 160 (100.0) | 63 (12.2)  | 0 (0.0)    | 2 (0.7)     | 514 (100.0) |
| AJCC-N | N0         | 236 (58.0) | 512 (47.3)   | 129 (43.9) | 162 (58.7)  | 0 (0.0)     | 174 (33.8) | 228 (44.7) | 47 (16.6)   | 0 (0.0)     |
|        | N1         | 46 (11.3)  | 355 (32.8)   | 57 (19.4)  | 68 (24.6)   | 0 (0.0)     | 66 (12.8)  | 16 (3.1)   | 24 (8.5)    | 0 (0.0)     |
|        | N2         | 75 (18.4)  | 119 (11.0)   | 0 (0.0)    | 44 (15.9)   | 0 (0.0)     | 168 (32.6) | 0 (0.0)    | 4 (1.4)     | 0 (0.0)     |
|        | N3         | 8 (2.0)    | 76 (7.0)     | 0 (0.0)    | 0 (0.0)     | 0 (0.0)     | 8 (1.6)    | 0 (0.0)    | 0 (0.0)     | 0 (0.0)     |
|        | Others     | 42 (10.3)  | 20 (1.8)     | 108 (36.7) | 2 (0.7)     | 160 (100.0) | 99 (19.2)  | 266 (52.2) | 208 (73.5)  | 514 (100.0) |
| AJCC-M | M0         | 195 (47.9) | 900 (83.2)   | 111 (37.8) | 184 (66.7)  | 0 (0.0)     | 183 (35.5) | 401 (78.6) | 91 (32.2)   | 0 (0.0)     |
|        | M1         | 11 (2.7)   | 21 (1.9)     | 9 (3.1)    | 36 (13.0)   | 0 (0.0)     | 1 (0.2)    | 78 (15.3)  | 9 (3.2)     | 0 (0.0)     |
|        | Others     | 201 (49.4) | 161 (14.9)   | 174 (59.2) | 56 (20.3)   | 160 (100.0) | 331 (64.3) | 31 (6.1)   | 183 (64.7)  | 514 (100.0) |

| Characteristic |          | LIHC(366)  | LUAD(510)  | LUSC(484)  | PAAD(177)  | PRAD(493)  | READ(89)  | SKCM(443)  | THCA(498)  | UCEC(173)  |
|----------------|----------|------------|------------|------------|------------|------------|-----------|------------|------------|------------|
| <i>MOR</i>     | Positive | 10 (2.7)   | 112 (22.0) | 83 (17.1)  | 73 (41.2)  | 60 (12.2)  | 17 (19.1) | 25 (5.6)   | 22 (4.4)   | 43 (24.9)  |
|                | Negative | 356 (97.3) | 398 (78.0) | 401 (82.9) | 104 (58.8) | 433 (87.8) | 72 (80.9) | 418 (94.4) | 476 (95.6) | 130 (75.1) |
| Age            |          | 59.5±13.4  | 65.3±10.0  | 67.2±8.5   | 64.5±10.9  | 61.0±6.9   | 62.7±12.6 | 57.5±15.7  | 47.3±15.8  | 65.7±11.4  |
| Age group      | Young    | 175 (47.8) | 157 (30.8) | 103 (21.3) | 59 (33.3)  | 221 (44.8) | 40 (44.9) | 245 (55.3) | 387 (77.7) | 54 (31.2)  |
|                | Old      | 190 (51.9) | 334 (65.5) | 370 (76.4) | 118 (66.7) | 272 (55.2) | 49 (55.1) | 190 (42.9) | 111 (22.3) | 116 (67.1) |
|                | Unknown  | 1 (0.3)    | 19 (3.7)   | 11 (2.3)   | 0 (0.0)    | 0 (0.0)    | 0 (0.0)   | 8 (1.8)    | 0 (0.0)    | 3 (1.7)    |



|            |            |            |             |             |            |             |            |             |             |             |
|------------|------------|------------|-------------|-------------|------------|-------------|------------|-------------|-------------|-------------|
| Gender     | Female     | 120 (32.8) | 274 (53.7)  | 126 (26.0)  | 80 (45.2)  | 0 (0.0)     | 42 (47.2)  | 169 (38.1)  | 363 (72.9)  | 173 (100.0) |
|            | Male       | 246 (67.2) | 236 (46.3)  | 356 (73.6)  | 97 (54.8)  | 493 (100.0) | 47 (52.8)  | 274 (61.9)  | 135 (27.1)  | 0 (0.0)     |
|            | Unknown    | 0 (0.0)    | 0 (0.0)     | 2 (0.4)     | 0 (0.0)    | 0 (0.0)     | 0 (0.0)    | 0 (0.0)     | 0 (0.0)     | 0 (0.0)     |
| Race       | Caucasian  | 180 (49.2) | 384 (75.3)  | 335 (69.2)  | 156 (88.1) | 147 (29.8)  | 73 (82.0)  | 424 (95.7)  | 329 (66.1)  | 83 (48.0)   |
|            | African    | 17 (4.6)   | 52 (10.2)   | 28 (5.8)    | 6 (3.4)    | 7 (1.4)     | 5 (5.6)    | 1 (0.2)     | 27 (5.4)    | 65 (37.6)   |
|            | Others     | 169 (46.2) | 74 (14.5)   | 121 (25.0)  | 15 (8.5)   | 339 (68.8)  | 11 (12.4)  | 18 (4.1)    | 142 (28.5)  | 25 (14.5)   |
| AJCC stage | Stage I    | 169 (46.2) | 275 (53.9)  | 235 (48.6)  | 21 (11.9)  | 0 (0.0)     | 12 (13.5)  | 89 (20.1)   | 282 (56.6)  | 0 (0.0)     |
|            | Stage II   | 86 (23.5)  | 123 (24.1)  | 157 (32.4)  | 146 (82.5) | 0 (0.0)     | 27 (30.3)  | 119 (26.9)  | 51 (10.2)   | 0 (0.0)     |
|            | Stage III  | 84 (23.0)  | 83 (16.3)   | 82 (16.9)   | 4 (2.3)    | 0 (0.0)     | 31 (34.8)  | 167 (37.7)  | 109 (21.9)  | 0 (0.0)     |
|            | Stage IV   | 6 (1.6)    | 27 (5.3)    | 7 (1.4)     | 4 (2.3)    | 0 (0.0)     | 15 (16.9)  | 24 (5.4)    | 54 (10.8)   | 0 (0.0)     |
|            | Others     | 21 (5.7)   | 2 (0.4)     | 3 (0.6)     | 2 (1.1)    | 493 (100.0) | 4 (4.5)    | 44 (9.9)    | 2 (0.4)     | 173 (100.0) |
| Grade      | Low Grade  | 227 (62.0) | 0 (0.0)     | 0 (0.0)     | 125 (70.6) | 0 (0.0)     | 0 (0.0)    | 0 (0.0)     | 0 (0.0)     | 34 (19.7)   |
|            | High Grade | 134 (36.6) | 0 (0.0)     | 0 (0.0)     | 50 (28.2)  | 0 (0.0)     | 0 (0.0)    | 0 (0.0)     | 0 (0.0)     | 139 (80.3)  |
|            | Others     | 5 (1.4)    | 510 (100.0) | 484 (100.0) | 2 (1.1)    | 493 (100.0) | 89 (100.0) | 443 (100.0) | 498 (100.0) | 0 (0.0)     |
| AJCC-T     | T1         | 178 (48.6) | 167 (32.7)  | 107 (22.1)  | 7 (4.0)    | 0 (0.0)     | 4 (4.5)    | 41 (9.3)    | 142 (28.5)  | 0 (0.0)     |
|            | T2         | 93 (25.4)  | 275 (53.9)  | 282 (58.3)  | 23 (13.0)  | 186 (37.7)  | 13 (14.6)  | 77 (17.4)   | 165 (33.1)  | 0 (0.0)     |
|            | T3         | 79 (21.6)  | 46 (9.0)    | 70 (14.5)   | 142 (80.2) | 290 (58.8)  | 62 (69.7)  | 89 (20.1)   | 167 (33.5)  | 0 (0.0)     |
|            | T4         | 13 (3.6)   | 19 (3.7)    | 23 (4.8)    | 3 (1.7)    | 10 (2.0)    | 10 (11.2)  | 129 (29.1)  | 22 (4.4)    | 0 (0.0)     |
|            | Others     | 3 (0.8)    | 3 (0.6)     | 2 (0.4)     | 2 (1.1)    | 7 (1.4)     | 0 (0.0)    | 107 (24.2)  | 2 (0.4)     | 173 (100.0) |
| AJCC-N     | N0         | 251 (68.6) | 328 (64.3)  | 306 (63.2)  | 49 (27.7)  | 342 (69.4)  | 41 (46.1)  | 216 (48.8)  | 226 (45.4)  | 0 (0.0)     |
|            | N1         | 3 (0.8)    | 96 (18.8)   | 126 (26.0)  | 123 (69.5) | 78 (15.8)   | 27 (30.3)  | 73 (16.5)   | 222 (44.6)  | 0 (0.0)     |
|            | N2         | 0 (0.0)    | 73 (14.3)   | 39 (8.1)    | 0 (0.0)    | 0 (0.0)     | 20 (22.5)  | 47 (10.6)   | 0 (0.0)     | 0 (0.0)     |

|        |        |            |            |            |           |             |           |            |            |             |
|--------|--------|------------|------------|------------|-----------|-------------|-----------|------------|------------|-------------|
|        | N3     | 0 (0.0)    | 2 (0.4)    | 5 (1.0)    | 0 (0.0)   | 0 (0.0)     | 0 (0.0)   | 55 (12.4)  | 0 (0.0)    | 0 (0.0)     |
|        | Others | 112 (30.6) | 11 (2.2)   | 8 (1.7)    | 5 (2.8)   | 73 (14.8)   | 1 (1.1)   | 52 (11.7)  | 50 (10.0)  | 173 (100.0) |
| AJCC-M | M0     | 263 (71.9) | 341 (66.9) | 392 (81.0) | 79 (44.6) | 0 (0.0)     | 65 (73.0) | 390 (88.0) | 277 (55.6) | 0 (0.0)     |
|        | M1     | 4 (1.1)    | 25 (4.9)   | 7 (1.4)    | 4 (2.3)   | 0 (0.0)     | 12 (13.5) | 25 (5.6)   | 9 (1.8)    | 0 (0.0)     |
|        | Others | 99 (27.0)  | 144 (28.2) | 85 (17.6)  | 94 (53.1) | 493 (100.0) | 12 (13.5) | 28 (6.3)   | 212 (42.6) | 173 (100.0) |

Footnotes: Young, under 60 years old; Old, over 60 years old; All the variables were described as frequencies and percentages, except for age described as mean and standard deviation.

Abbreviations: BLCA, bladder urothelial carcinoma; BRCA, breast invasive carcinoma; CESC, cervical squamous cell carcinoma; COAD, colon adenocarcinoma; GBM, glioblastoma multiforme; HNSC, head and neck squamous cell carcinoma; KIRC, kidney renal clear cell carcinoma; KIRP, kidney renal papillary cell carcinoma; LGG, brain lower grade Glioma; LIHC, liver hepatocellular carcinoma; LUAD, lung adenocarcinoma; LUSC, lung squamous cell carcinoma; PAAD, pancreatic adenocarcinoma; PRAD, prostate adenocarcinoma; READ, rectal adenocarcinoma; SKCM, skin cutaneous melanoma; THCA, thyroid carcinoma; UCEC, uterine corpus endometrial carcinoma; MOR, mu opioid receptor; TCGA, the Cancer Genome Atlas; AJCC, the American Joint Committee on Cancer; TNM, Tumor node metastasis.

**Supplementary Table 2.** Baseline characteristics of the included patients in the TCGA database.

| Characteristic | Total<br>N = 2178 | <i>MOR</i> (-)<br>N = 1089 | <i>MOR</i> (+)<br>N = 1089 | <i>P</i> -value |
|----------------|-------------------|----------------------------|----------------------------|-----------------|
| Age            |                   |                            |                            | 0.687           |
|                | 57.6±15.1         | 57.7±15.0                  | 57.4±15.2                  |                 |
| Age group      |                   |                            |                            | 0.999           |
| Young          | 1143              | 572 (52.5)                 | 571 (52.4)                 |                 |
| Old            | 1035              | 517 (47.5)                 | 518 (47.6)                 |                 |
| Gender         |                   |                            |                            | 0.547           |
| Female         | 987               | 501 (46.0)                 | 486 (44.6)                 |                 |
| Male           | 1191              | 588 (54.0)                 | 603 (55.4)                 |                 |
| Race           |                   |                            |                            | 0.792           |
| Caucasian      | 1702              | 856 (78.6)                 | 846 (77.7)                 |                 |
| African        | 201               | 96 (8.8)                   | 105 (9.6)                  |                 |
| Others         | 275               | 137 (12.6)                 | 138 (12.7)                 |                 |
| AJCC stage     |                   |                            |                            | 0.972           |
| Stage I        | 391               | 197 (18.1)                 | 194 (17.8)                 |                 |
| Stage II       | 417               | 204 (18.7)                 | 213 (19.6)                 |                 |
| Stage III      | 264               | 129 (11.8)                 | 135 (12.4)                 |                 |
| Stage IV       | 236               | 118 (10.8)                 | 118 (10.8)                 |                 |
| Others         | 870               | 441 (40.5)                 | 429 (39.4)                 |                 |
| Grade          |                   |                            |                            | 0.904           |
| Low Grade      | 633               | 315 (28.9)                 | 318 (29.2)                 |                 |
| High Grade     | 657               | 325 (29.8)                 | 332 (30.5)                 |                 |
| Others         | 888               | 449 (41.2)                 | 439 (40.3)                 |                 |
| AJCC-T         |                   |                            |                            | 0.995           |
| T1             | 301               | 150 (13.8)                 | 151 (13.9)                 |                 |
| T2             | 547               | 272 (25.0)                 | 275 (25.3)                 |                 |
| T3             | 430               | 212 (19.5)                 | 218 (20.0)                 |                 |
| T4             | 184               | 93 (8.5)                   | 91 (8.4)                   |                 |
| Others         | 716               | 362 (33.2)                 | 354 (32.5)                 |                 |
| AJCC-N         |                   |                            |                            | 0.921           |

|        |      |            |            |       |
|--------|------|------------|------------|-------|
| N0     | 761  | 380 (34.9) | 381 (35.0) |       |
| N1-3   | 543  | 268 (24.6) | 275 (25.3) |       |
| Others | 874  | 441 (40.5) | 433 (39.8) |       |
| AJCC-M |      |            |            | 0.938 |
| M0     | 846  | 419 (38.5) | 427 (39.2) |       |
| M1     | 86   | 43 (3.9)   | 43 (3.9)   |       |
| Others | 1246 | 627 (57.6) | 619 (56.8) |       |

Footnotes: *MOR* (+) represented positive *MOR* mRNA expression; *MOR* (-) represented negative *MOR* mRNA expression; Young, under 60 years old; Old, over 60 years old; All the variables were described as frequencies and percentages, except for age described as mean and standard deviation.

Abbreviations: TCGA, the Cancer Genome Atlas; MOR, mu opioid receptor; AJCC, the American Joint Committee on Cancer; TNM, Tumor node metastasis.

**Supplementary Table 3.** Baseline characteristics of included patients by cancer type.

| Characteristic    | Type I<br>N = 2546 | Type II<br>N = 2546 | Type III<br>N = 1091 | Type IV<br>N = 1091 |
|-------------------|--------------------|---------------------|----------------------|---------------------|
| <b>MOR</b>        |                    |                     |                      |                     |
| <i>MOR (+)</i>    | 366 (14.4)         | 444 (17.4)          | 175 (16.0)           | 127 (11.6)          |
| <i>MOR (-)</i>    | 2180 (85.6)        | 2102 (82.6)         | 916 (84.0)           | 964 (88.4)          |
| <b>Age</b>        |                    |                     |                      |                     |
|                   | 60.2±13.7          | 57.8±15.0           | 58.6±14.8            | 59.4±12.7           |
| <b>Age group</b>  |                    |                     |                      |                     |
| Young             | 1198 (47.1)        | 1342 (52.7)         | 546 (50.0)           | 544 (49.9)          |
| Old               | 1318 (51.8)        | 1174 (46.1)         | 516 (47.3)           | 534 (48.9)          |
| Unknown           | 30 (1.2)           | 30 (1.2)            | 29 (2.7)             | 13 (1.2)            |
| <b>Gender</b>     |                    |                     |                      |                     |
| Female            | 1348 (52.9)        | 1162 (45.6)         | 545 (50.0)           | 549 (50.3)          |
| Male              | 1192 (46.8)        | 1357 (53.3)         | 523 (47.9)           | 540 (49.5)          |
| Unknown           | 6 (0.2)            | 27 (1.1)            | 23 (2.1)             | 2 (0.2)             |
| <b>Race</b>       |                    |                     |                      |                     |
| Caucasian         | 1968 (77.3)        | 1743 (68.5)         | 807 (74.0)           | 704 (64.5)          |
| African           | 215 (8.4)          | 242 (9.5)           | 103 (9.4)            | 126 (11.5)          |
| Others            | 363 (14.3)         | 561 (22.0)          | 181 (16.6)           | 261 (23.9)          |
| <b>AJCC stage</b> |                    |                     |                      |                     |
| Stage I           | 808 (31.7)         | 422 (16.6)          | 273 (25.0)           | 252 (23.1)          |
| Stage II          | 637 (25.0)         | 539 (21.2)          | 247 (22.6)           | 287 (26.3)          |
| Stage III         | 516 (20.3)         | 389 (15.3)          | 182 (16.7)           | 194 (17.8)          |
| Stage IV          | 282 (11.1)         | 189 (7.4)           | 158 (14.5)           | 60 (5.5)            |
| Others            | 303 (11.9)         | 1007 (39.6)         | 231 (21.2)           | 298 (27.3)          |
| <b>Grade</b>      |                    |                     |                      |                     |
| Low Grade         | 472 (18.5)         | 541 (21.2)          | 217 (19.9)           | 162 (14.8)          |
| High Grade        | 494 (19.4)         | 597 (23.4)          | 194 (17.8)           | 205 (18.8)          |
| Others            | 1580 (62.1)        | 1408 (55.3)         | 680 (62.3)           | 724 (66.4)          |
| <b>AJCC-T</b>     |                    |                     |                      |                     |
| T1                | 713 (28.0)         | 390 (15.3)          | 208 (19.1)           | 245 (22.5)          |



|        |             |             |            |            |
|--------|-------------|-------------|------------|------------|
| T2     | 860 (33.8)  | 647 (25.4)  | 330 (30.2) | 368 (33.7) |
| T3     | 597 (23.4)  | 657 (25.8)  | 253 (23.2) | 310 (28.4) |
| T4     | 201 (7.9)   | 176 (6.9)   | 108 (9.9)  | 69 (6.3)   |
| Others | 175 (6.9)   | 676 (26.6)  | 192 (17.6) | 99 (9.1)   |
| AJCC-N |             |             |            |            |
| N0     | 1243 (48.8) | 1058 (41.6) | 418 (38.3) | 528 (48.4) |
| N1-3   | 886 (34.8)  | 570 (22.4)  | 342 (31.3) | 325 (29.8) |
| Others | 417 (16.4)  | 918 (36.1)  | 331 (30.3) | 238 (21.8) |
| AJCC-M |             |             |            |            |
| M0     | 1696 (66.6) | 1050 (41.2) | 531 (48.7) | 595 (54.5) |
| M1     | 100 (3.9)   | 85 (3.3)    | 26 (2.4)   | 40 (3.7)   |
| Others | 750 (29.5)  | 1411 (55.4) | 534 (48.9) | 456 (41.8) |

Footnotes: Young, under 60 years old; Old, over 60 years old; All the variables were described as frequencies and percentages, except for age described as mean and standard deviation.

Abbreviations: *MOR*, mu opioid receptor; AJCC, the American Joint Committee on Cancer; TNM, Tumor node metastasis.
